# Supplementary material for: One-pot three-step mechanically assisted synthesis and catalytic performance of tripodal metallic complexes
Source: Royal Society of Chemistry journal article supplement (doi:10.1039/d1re00194a), 2021-01-01
Supplement: d1re00194a1.pdf [file d1re00194a1.pdf]

## All-green catalysis: One-pot mechanosynthesis and catalytic performance of tripodal metallic complexes

Rima Tedjini<sup>a,b</sup>, Raquel Viveiros<sup>b</sup>, Teresa Casimiro<sup>b</sup> and Vasco D.B. Bonifácio<sup>c\*</sup>

<sup>a</sup>Laboratory of Applied Organic Chemistry, Faculty of Chemistry, University of Science and Technology Houari Boumediene, BP 32, Alia Bab-Ezzouar, 16111 Algiers, Algeria.

<sup>b</sup>LAQV-REQUIMTE, Chemistry Department, NOVA School of Science & Technology|FCT NOVA, NOVA University of Lisbon, Caparica, 2829-516 Caparica, Portugal.

<sup>c</sup>iBB-Institute for Bioengineering and Biosciences, Instituto Superior Técnico, Universidade de Lisboa, Av. Rovisco Pais, 1049-001 Lisboa, Portugal.

<sup>d</sup>i4HB-Institute for Health and Bioeconomy, Instituto Superior Técnico, Universidade de Lisboa, Av. Rovisco Pais, 1049-001 Lisboa, Portugal.

\*E-mail: [vasco.bonifacio@tecnico.ulisboa.pt](mailto:vasco.bonifacio@tecnico.ulisboa.pt)

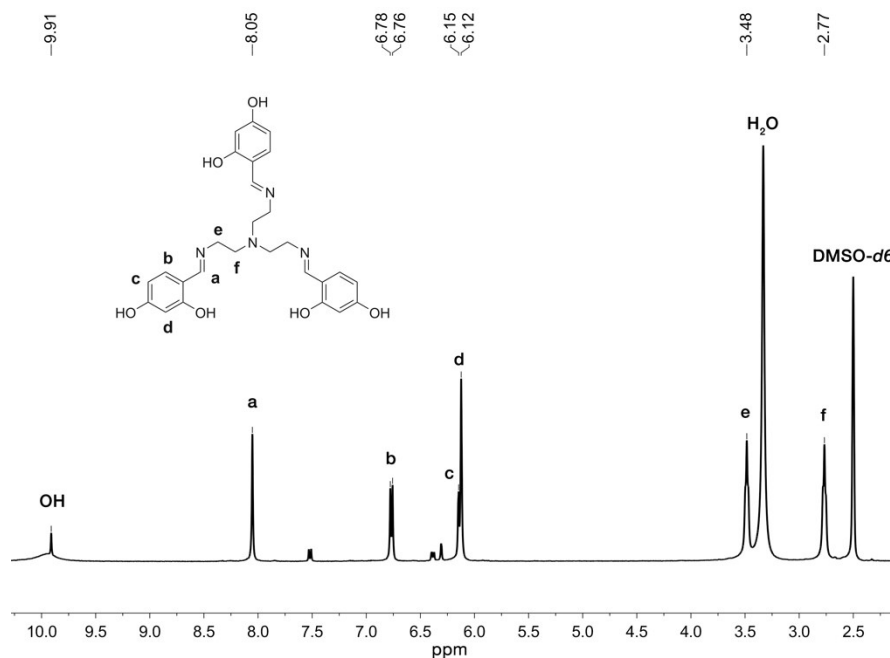

Figure S1. <sup>1</sup>H-NMR spectrum of ligand **1** in DMSO-*d*<sub>6</sub>.

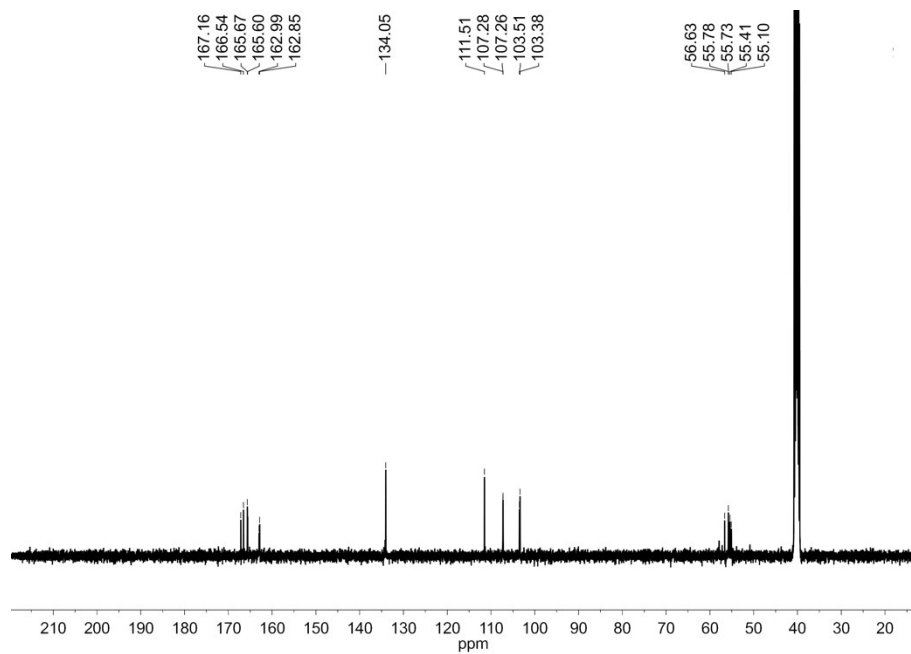

Figure S2.  $^{13}\text{C}$ -NMR spectrum of ligand **1** in  $\text{DMSO-}d_6$ .

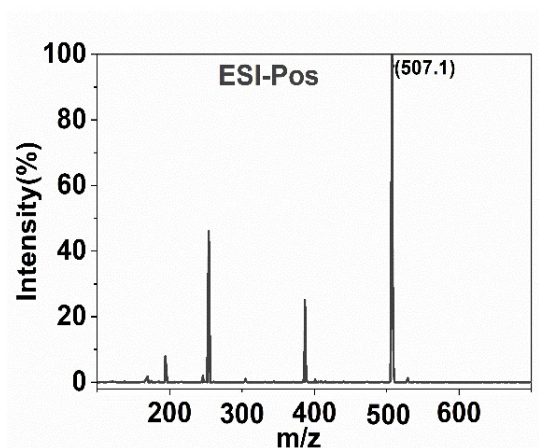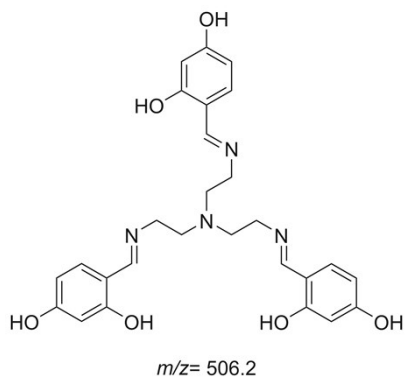

Figure S3. Mass spectrum of ligand **1**.

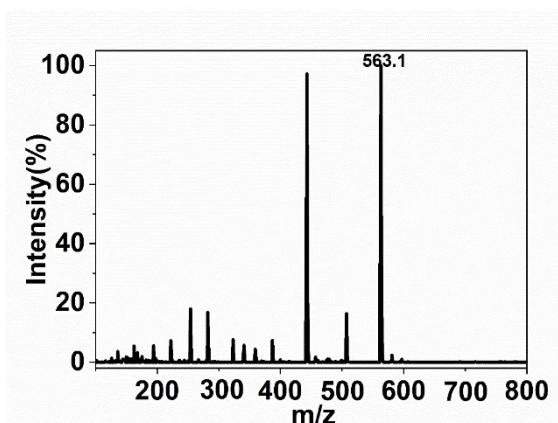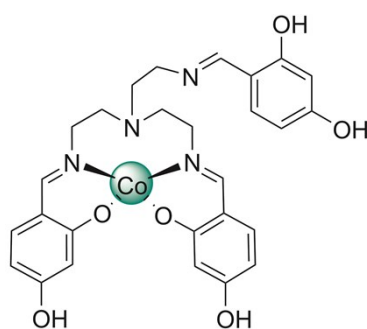

$m/z = 563.1$

Figure S4. Mass spectrum of cobalt complex 2.

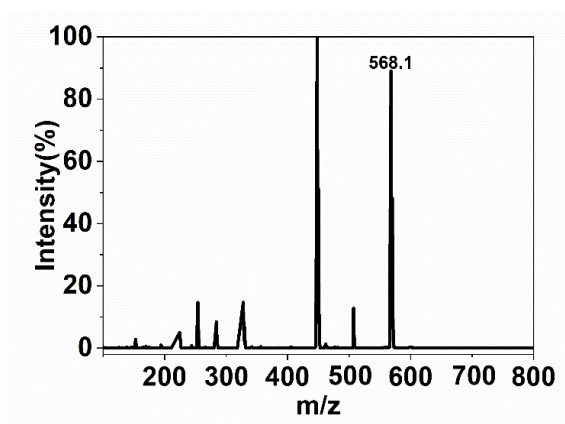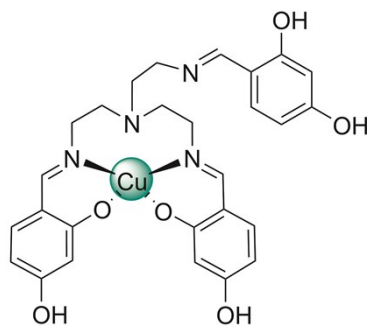

$m/z = 567.1$

Figure S5. Mass spectrum of copper complex 3.

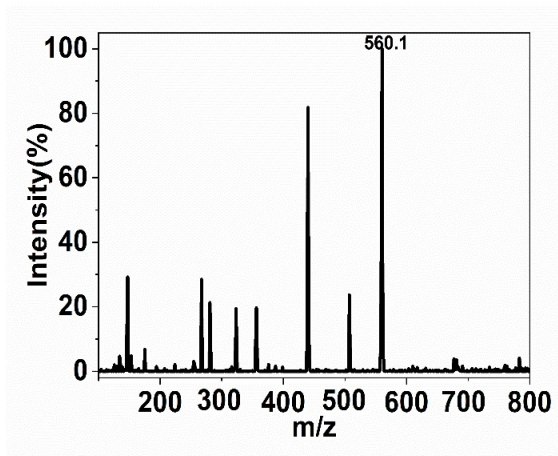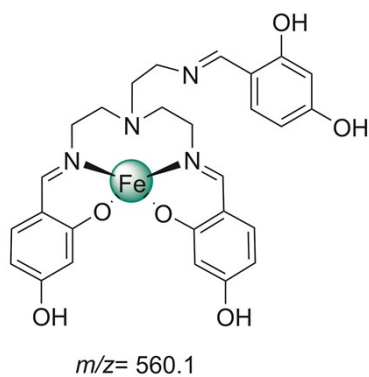

**Figure S6.** Mass spectrum of iron complex 4.

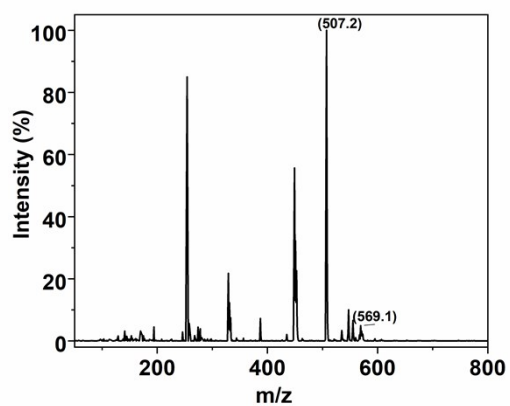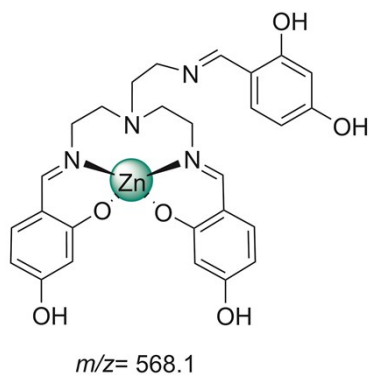

**Figure S7.** Mass spectrum of zinc complex 5. A low ionization was observed for complex 5, being  $[M-Zn]^+$  the most intense peak observed ( $m/z = 507.2$ ).
